# Supplementary material for: Platelet-Rich Plasma and Acellular Dermal Matrix in the Surgical Treatment of Hidradenitis Suppurativa: A Comparative Retrospective Study
Source: MDPI journal article supplement (doi:10.3390/jcm12062112), 2023-03-08
Supplement: s1 [file s1]

**Table S1.** STROBE statement (*Platelet-Rich Plasma assisted skin flaps reconstructions and Co-graft of Acellular Dermal Matrix and Split Thickness Skin Graft as a surgical treatment of Hidradenitis Suppurativa: a comparative retrospective study* by Gierek, M. et al).

|                          | Item No | Recommendation                                                                                                                                                                             | Page |
|--------------------------|---------|--------------------------------------------------------------------------------------------------------------------------------------------------------------------------------------------|------|
| Title and abstract       | 1       | (a) Indicate the study's design with a commonly used term in the title or the abstract                                                                                                     | 1    |
|                          |         | (b) Provide in the abstract an informative and balanced summary of what was done and what was found                                                                                        | 1    |
| <b>Introduction</b>      |         |                                                                                                                                                                                            |      |
| Background/rationale     | 2       | Explain the scientific background and rationale for the investigation being reported                                                                                                       | 1,2  |
| Objectives               | 3       | State specific objectives, including any prespecified hypotheses                                                                                                                           | 2    |
| <b>Methods</b>           |         |                                                                                                                                                                                            |      |
| Study design             | 4       | Present key elements of study design early in the paper                                                                                                                                    | 3    |
| Setting                  | 5       | Describe the setting, locations, and relevant dates, including periods of recruitment, exposure, follow-up, and data collection                                                            | 3    |
| Participants             | 6       | (a) <i>Cohort study</i> —Give the eligibility criteria, and the sources and methods of selection of participants. Describe methods of follow-up                                            | 3    |
|                          |         | <i>Case-control study</i> —Give the eligibility criteria, and the sources and methods of case ascertainment and control selection. Give the rationale for the choice of cases and controls |      |
|                          |         | <i>Cross-sectional study</i> —Give the eligibility criteria, and the sources and methods of selection of participants                                                                      |      |
|                          |         | (b) <i>Cohort study</i> —For matched studies, give matching criteria and number of exposed and unexposed                                                                                   |      |
|                          |         | <i>Case-control study</i> —For matched studies, give matching criteria and the number of controls per case                                                                                 |      |
| Variables                | 7       | Clearly define all outcomes, exposures, predictors, potential confounders, and effect modifiers. Give diagnostic criteria, if applicable                                                   | 6-11 |
| Data sources/measurement | 8*      | For each variable of interest, give sources of data and details of methods of assessment (measurement). Describe comparability of assessment methods if there is more than one group       | 6    |
| Bias                     | 9       | Describe any efforts to address potential sources of bias                                                                                                                                  |      |
| Study size               | 10      | Explain how the study size was arrived at                                                                                                                                                  | 6    |
| Quantitative variables   | 11      | Explain how quantitative variables were handled in the analyses. If applicable, describe which groupings were chosen and why                                                               | 5    |

|                     | Item No | Recommendation                                                                                                                                                                                               | Page           |
|---------------------|---------|--------------------------------------------------------------------------------------------------------------------------------------------------------------------------------------------------------------|----------------|
| Statistical methods | 12      | (a) Describe all statistical methods, including those used to control for confounding.                                                                                                                       | 5,6            |
|                     |         | (b) Describe any methods used to examine subgroups and interactions                                                                                                                                          | 5              |
|                     |         | (c) Explain how missing data were addressed                                                                                                                                                                  | 5              |
|                     |         | (d) <i>Cohort study</i> —If applicable, explain how loss to follow-up was addressed                                                                                                                          | Not applicable |
|                     |         | <i>Case-control study</i> —If applicable, explain how matching of cases and controls was addressed                                                                                                           |                |
|                     |         | <i>Cross-sectional study</i> —If applicable, describe analytical methods taking account of sampling strategy                                                                                                 |                |
|                     |         | (e) Describe any sensitivity analyses                                                                                                                                                                        |                |
| <b>Results</b>      |         |                                                                                                                                                                                                              |                |
| Participants        | 13*     | (a) Report numbers of individuals at each stage of study—eg numbers potentially eligible, examined for eligibility, confirmed eligible, included in the study, completing follow-up, and analysed            | 3-6            |
|                     |         | (b) Give reasons for non-participation at each stage                                                                                                                                                         | Not applicable |
|                     |         | (c) Consider use of a flow diagram                                                                                                                                                                           |                |
| Descriptive data    | 14*     | (a) Give characteristics of study participants (eg demographic, clinical, social) and information on exposures and potential confounders.                                                                    | 3-6            |
|                     |         | (b) Indicate number of participants with missing data for each variable of interest                                                                                                                          | Not applicable |
|                     |         | (c) <i>Cohort study</i> —Summarise follow-up time (eg, average and total amount)                                                                                                                             |                |
| Outcome data        | 15*     | <i>Cohort study</i> —Report numbers of outcome events or summary measures over time                                                                                                                          | 3-6            |
|                     |         | <i>Case-control study</i> —Report numbers in each exposure category, or summary measures of exposure                                                                                                         |                |
|                     |         | <i>Cross-sectional study</i> —Report numbers of outcome events or summary measures                                                                                                                           |                |
| Main results        | 16      | (a) Give unadjusted estimates and, if applicable, confounder-adjusted estimates and their precision (eg, 95% confidence interval). Make clear which confounders were adjusted for and why they were included | 6-11           |
|                     |         | (b) Report category boundaries when continuous variables were categorized                                                                                                                                    | Not applicable |
|                     |         | (c) If relevant, consider translating estimates of relative risk into absolute risk for a meaningful time period                                                                                             |                |
| Other analyses      | 17      | Report other analyses done—eg analyses of subgroups and interactions, and sensitivity analyses.                                                                                                              | 5-11           |

| <b>Discussion</b>        | <b>Item<br/>No</b> | <b>Recommendation</b>                                                                                                                                                       | <b>Page</b> |
|--------------------------|--------------------|-----------------------------------------------------------------------------------------------------------------------------------------------------------------------------|-------------|
| Key results              | 18                 | Summarise key results with reference to study objectives.                                                                                                                   | 11-13       |
| Limitations              | 19                 | Discuss limitations of the study, taking into account sources of potential bias or imprecision. Discuss both direction and magnitude of any potential bias                  | 12          |
| Interpretation           | 20                 | Give a cautious overall interpretation of results considering objectives, limitations, multiplicity of analyses, results from similar studies, and other relevant evidence. | 13          |
| Generalisability         | 21                 | Discuss the generalisability (external validity) of the study results                                                                                                       | 13          |
| <b>Other information</b> |                    |                                                                                                                                                                             |             |
| Funding                  | 22                 | Give the source of funding and the role of the funders for the present study and, if applicable, for the original study on which the present article is based               | 13          |
